# Supplementary material for: Unravelling the gender productivity gap in science: a meta-analytical review
Source: R Soc Open Sci. 2019 Jun 12;6(6):181566. doi: 10.1098/rsos.181566 (PMC6599789; doi:10.1098/rsos.181566)
Supplement: Table S2 [file rsos181566supp3.xlsx]

## Sheet: Sheet1
Table S2. Eligibility criteria. We include a list of the possible targets evaluated, study designs and data types for a study to be included in our meta-analysis
* Indicate items that where not originally in our eligibility criteria, but that where added during the review process after discussion about its suitability of the three authors
	Q1 (a and b)	Q2	Q3	Q4
Data type	Scientific journals	Scientific journals	Number of citations	Scientific text quality (e.g. Conference summary, article)
	Funding calls for scientific projects	Funding calls for scientific projects	Impact index	Scientists CVs
	Funding calls for grants	Funding calls for grants	Citation rates
	Faculty in universities/research centers	Faculty in universities/research centers
	Scientists CVs	Scientists CVs
	Patents authors*	Patents authors*
Response variable	Number/proportion articles with female first/last author	Proportion of accepted/submitted articles by gender	Number citations by gender	Score/hierability CV by gender
	Number/proportion scientific projects with female as IP	Proportion of accepted/submitted scientific projects by gender	Quality index value by gender	Score/acceptance rate scientific text by gender
	Number/proportion females granted research grants	Proportion of accepted/submitted research grants by gender	Citation rates by gender
	Number/proportion females in editorial boards	Proportion women/men in editorial boards in relation to the proportion of men/women in the field	Total funding received by a researcher by gender*
	Number/proportion females as faculty/research associates	Proportion women/men as faculty in relation to the proportion of men/women in the field
	Number/proportion females registering patents*	Proportion women/men registering patents in relation to the proportion of men/women in the field*
		Proportion of articles asked for revision/submitted articles by gender*
Factor of analysis	Comparison authorship articles	Comparison authorship accepted/submitted articles	Comparison number citations by gender	Comparison quality CV with names changed
	Comparison authorship scientific projects	Comparison authorship accepted/submitted scientific projects	Comparison quality index (e.g. H-index) by gender	Comparison quality scientific text with names changed
	Comparison gender awardees research grants	Comparison authorship accepted/submitted research grants	Comparison citations rates by gender	Comparison quality similar CVs with male/female authors*
	Comparison gender editorial boards journals	Comparison sex proportionality in editorial boards of journals/sex proportionality in that area	Comparison total funding received by gender*	Comparison quality scientific text of similar quality with male/female authors*
	Comparison gender faculty/research centers	Comparison sex proportionality in faculty/research centers
	Comparison gender proportionality patent authors*	Comparison sex proportionality patent authors*
		Comparison revision asked/submitted articles*
